# Supplementary material for: The Association between Trajectories of Loneliness and Physical Frailty in Chinese Older Adults: Does Age Matter?
Source: Int J Environ Res Public Health. 2022 Apr 22;19(9):5105. doi: 10.3390/ijerph19095105 (PMC9101367; doi:10.3390/ijerph19095105)
Supplement: Supplementary file 1 [file ijerph-19-05105-s001.zip › ijerph-1637416-supplementary.pdf]

## Supplementary materials

**Table S1.** Baseline characteristics of the participants according to different age groups

|                                               | 60-64<br>(N =1849)  | 65-74<br>(N =2141)  | ≥75<br>(N =628)     | Total<br>(N =4618)  | P-value |
|-----------------------------------------------|---------------------|---------------------|---------------------|---------------------|---------|
| gender, n(%)                                  |                     |                     |                     |                     | 0.025   |
| women                                         | 931(50.4)           | 986(46.1)           | 301(47.9)           | 2218(48.0)          |         |
| men                                           | 918(49.6)           | 1155(53.9)          | 327(52.1)           | 2400(52.0)          |         |
| residence, n(%)                               |                     |                     |                     |                     | 0.065   |
| rural                                         | 1218(65.9)          | 1406(65.7)          | 383(61.0)           | 3007(65.1)          |         |
| urban                                         | 631(34.1)           | 735(34.3)           | 245(39.0)           | 1611(34.9)          |         |
| education level, n(%)                         |                     |                     |                     |                     | <0.001  |
| illiterate                                    | 512(27.7)           | 670(31.3)           | 344(54.8)           | 1526(33.1)          |         |
| no formal education                           | 471(25.5)           | 421(19.7)           | 122(19.4)           | 1014(22.0)          |         |
| elementary school                             | 525(28.4)           | 624(29.2)           | 92(14.6)            | 1241(26.9)          |         |
| middle school or above                        | 340(18.4)           | 425(19.9)           | 70(11.1)            | 835(18.1)           |         |
| marital status, n(%)                          |                     |                     |                     |                     | <0.001  |
| without spouse                                | 155(8.4)            | 378(17.7)           | 232(36.9)           | 765(16.6)           |         |
| with spouse                                   | 1694(91.6)          | 1763(82.3)          | 396(63.1)           | 3853(83.4)          |         |
| income, mean(SD)                              | 4981.7<br>(10646.4) | 6080.7<br>(11750.6) | 6460.1<br>(12021.3) | 5690.8<br>(11371.4) | 0.002   |
| self-rated health, n(%)                       |                     |                     |                     |                     | 0.011   |
| good                                          | 388(21.0)           | 408(19.1)           | 153(24.4)           | 949(20.6)           |         |
| so so                                         | 879(47.6)           | 1003(46.8)          | 298(47.5)           | 2180(47.2)          |         |
| bad                                           | 580(31.4)           | 730(34.1)           | 177(28.2)           | 1487(32.2)          |         |
| number of chronic diseases,<br>mean(SD)       | 1.5(1.4)            | 1.6(1.4)            | 1.4(1.4)            | 1.5(1.4)            | 0.024   |
| pain, n(%)                                    |                     |                     |                     |                     | 0.239   |
| no                                            | 1152(64.8)          | 1290(65.2)          | 399(68.6)           | 2841(65.5)          |         |
| yes                                           | 625(35.2)           | 690(34.8)           | 183(31.4)           | 1498(34.5)          |         |
| smoking, n(%)                                 |                     |                     |                     |                     | 0.012   |
| no                                            | 1077(64.3)          | 1209(63.2)          | 382(70.1)           | 2668(64.6)          |         |
| yes                                           | 598(35.7)           | 704(36.8)           | 163(29.9)           | 1465(35.4)          |         |
| frequency of contact with<br>children, n(%)   |                     |                     |                     |                     | <0.001  |
| seldom contact                                | 191 (19.4)          | 333 (24.5)          | 186 (40.4)          | 710 (25.3)          |         |
| monthly contact                               | 240 (24.3)          | 364 (26.8)          | 66 (14.3)           | 670 (23.9)          |         |
| weekly contact                                | 555 (56.3)          | 663 (48.8)          | 208 (45.2)          | 1426 (50.8)         |         |
| activity participation<br>frequency, mean(SD) | 1.5(2.0)            | 1.5(2.0)            | 1.6 (1.9)           | 1.5(2.0)            | 0.290   |
| cognitive ability, mean(SD)                   | 13.7(5.5)           | 12.5(5.6)           | 10.0(5.6)           | 12.6(5.7)           | <0.001  |

**Table S2.** Definition and values of five criteria for physical frailty in older adults

Weakness was measured using a hand-held mechanical dynamometer by maximum grip strength of either hand (two tests for each hand, standing position). Adjusting for gender and body mass index (BMI), those  $\leq$  20th percentiles of the participants' distribution were defined as weakness. Slowness was measured by walking speed, using the average time taken in two trials of 2.5 meters. Adjusting for gender and height, those  $\leq$  20th percentile of the participants' distribution was defined as slowness. Exhaustion was represented by two questions from the Center for Epidemiological Studies Depression (CESD) scale. Participants met criteria of exhaustion if they answered "Occasionally or a moderate amount of the time (3-4 days)" or "Most or all of the time (5-7 days)" to either of the two questions: "I felt everything I did was an effort" and "I could not get going." Participants were defined as a low activity if they did not make any vigorous activities/moderate physical effort/ walking for at least 10 minutes continuously during a week. Participants met shrinking criteria if they were self-reporting loss of 5 or more kilograms between wave 1 and wave 2 or declined 5 or more kilograms between wave 2 and wave 3.

PF was used as categorical variable when we constructed physical frailty status transition types. Participants with no criteria were classified as robust, with one or two criteria were classified into prefrail, and those with three to five criteria were defined as frail. The PF was used as continuous variable in the operation of changes in PF. The number of criteria identified physical frailty level met, with more standards indicating high levels of physical frailty.

| Criteria     | Definition    | Values                                                                                                                    |                                                             |
|--------------|---------------|---------------------------------------------------------------------------------------------------------------------------|-------------------------------------------------------------|
|              |               | Female                                                                                                                    | Male                                                        |
| weakness     | gait strength | $BMI \leq 20.6 \text{ kg/m}^2: \leq 18.0 \text{ kg}$                                                                      | $BMI \leq 20.0 \text{ kg/m}^2: \leq 27.0 \text{ kg}$        |
|              |               | $20.6 < BMI \leq 23.1 \text{ kg/m}^2: \leq 18.2 \text{ kg}$                                                               | $20.0 < BMI \leq 22.0 \text{ kg/m}^2: \leq 28.5 \text{ kg}$ |
|              |               | $23.1 < BMI \leq 25.7 \text{ kg/m}^2: \leq 20.0 \text{ kg}$                                                               | $22.0 < BMI \leq 24.4 \text{ kg/m}^2: \leq 30.0 \text{ kg}$ |
|              |               | $BMI > 25.7 \text{ kg/m}^2: \leq 20.0 \text{ kg}$                                                                         | $BMI > 24.4 \text{ kg/m}^2: \leq 31.5 \text{ kg}$           |
| walking      | walking speed | height $\leq 151 \text{ cm}: \leq 0.41 \text{ m/s}$                                                                       | height $\leq 162 \text{ cm}: \leq 0.47 \text{ m/s}$         |
|              |               | height $> 151 \text{ cm}: \leq 0.45 \text{ m/s}$                                                                          | height $> 162 \text{ cm}: \leq 0.50 \text{ m/s}$            |
| exhaustion   | self-reported | felt " everything I did was an effort " or " I could not get going " about 3-4 days or 5-7 days in a week                 |                                                             |
| low activity | self-reported | did not do any vigorous activities or moderate activities or walking for at least 10 min continuously during a usual week |                                                             |
| shrinking    | self-reported | lost 5 or more kilograms in the last year or weight declined 5 or more kilograms between wave 2 and wave 3.               |                                                             |

BMI: body mass index

**Table S3.** Physical frailty and loneliness transition types between baseline and follow-up

Table 3 shows the transition types of physical frailty and loneliness between the baseline and follow-up.

Of the 4618 participants at baseline, 1097 (23.8%) participants experienced worsening physical frailty and 894 (19.4%) participants transitioned to a better physical frailty status at T<sub>2</sub>. Nearly 22% (1025) of participants remained robust and 35% (1602) participants continued in an unhealthy state (prefrail or frail) from baseline to T<sub>2</sub>. There were significant differences in the distribution of physical frailty transition types between age groups. The proportion of people under 65 years of age who maintained baseline robust status and experienced improvement was higher than those in the other two groups. Nearly 30% of participants over age of 75 experience worsening in physical frailty status and over 40% maintained their baseline unhealthy physical frailty status.

Most of participants maintained their baseline loneliness levels across the waves. The proportion of the baseline older adults with worsening loneliness and improving loneliness was 17.6% and 18.0%, respectively. The type of loneliness transitions was significantly different between T<sub>1</sub> and T<sub>2</sub> for participants in different age groups.  $\geq 75$  group had a lower rate of maintaining baseline loneliness status and a higher rate of improvement than the younger older group.

|                  | T1-T2       |             |             |                  |
|------------------|-------------|-------------|-------------|------------------|
|                  | total(n, %) | 60-64(n, %) | 65-74(n, %) | $\geq 75$ (n, %) |
| physical frailty |             |             |             |                  |
| remain robust    | 1025(22.2)  | 494(26.7)   | 454(21.2)   | 77(12.3)         |
| worsen           | 1097(23.8)  | 395(21.4)   | 514(24.0)   | 188(29.9)        |
| improve          | 894(19.4)   | 397(21.5)   | 399(18.6)   | 98(15.6)         |
| remain unhealthy | 1602(34.7)  | 563(30.5)   | 774(36.2)   | 265(42.2)        |
| loneliness       |             |             |             |                  |
| maintain         | 2973(64.4)  | 1213(65.6)  | 1375(64.2)  | 385(61.3)        |
| worsen           | 813(17.6)   | 336(18.2)   | 371(17.3)   | 106(16.9)        |
| improve          | 832(18.0)   | 300(16.2)   | 395(18.5)   | 137(21.8)        |

Notes: chi-squared test for physical frailty transitions by age groups between T1 and T2 :  $p < 0.0001$ ;

chi-squared test for loneliness transitions by age groups between T1 and T2 :  $p < 0.032$ ;

**Table S4.** Odds ratios (95% CI) for baseline loneliness and PF transition types, baseline PF and loneliness transition types

|                     | Model 1: PF transition types (OR(95%CI)) |                        |                       |                       | Model 2: loneliness transition types (OR(95%CI)) |                         |                        |
|---------------------|------------------------------------------|------------------------|-----------------------|-----------------------|--------------------------------------------------|-------------------------|------------------------|
|                     | Remain robust                            | Worsen                 | Improve               | Remain unhealthy      | Maintain                                         | Worsen                  | Improve                |
| baseline loneliness |                                          |                        |                       |                       |                                                  |                         |                        |
| 60-64               | 0.50***<br>[0.41 - 0.61]                 | 1.26*<br>[1.05 - 1.52] | 0.93<br>[0.79 - 1.10] | 1.14<br>[0.98 - 1.32] |                                                  |                         |                        |
| 65-70               | 0.60***<br>[0.48 - 0.76]                 | 1.18<br>[0.97 - 1.45]  | 0.99<br>[0.82 - 1.20] | 1.07<br>[0.90 - 1.27] |                                                  |                         |                        |
| ≥70                 | 0.61***<br>[0.47 - 0.78]                 | 1.01<br>[0.91 - 1.34]  | 0.87<br>[0.71 - 1.05] | 1.12<br>[0.96 - 1.30] |                                                  |                         |                        |
| 60-64               | 0.50***<br>[0.41 - 0.61]                 | 1.26*<br>[1.05 - 1.52] | 0.93<br>[0.79 - 1.01] | 1.14<br>[0.98 - 1.32] |                                                  |                         |                        |
| 65-80               | 0.60***<br>[0.50 - 0.71]                 | 1.16*<br>[1.01 - 1.34] | 0.93<br>[0.81 - 1.07] | 1.09<br>[0.97 - 1.22] |                                                  |                         |                        |
| ≥80                 | 0.91<br>[0.49 - 1.69]                    | 1.01<br>[0.66 - 1.84]  | 0.75<br>[0.43 - 1.32] | 1.06<br>[0.72 - 1.56] |                                                  |                         |                        |
| baseline PF         |                                          |                        |                       |                       |                                                  |                         |                        |
| 60-64               |                                          |                        |                       |                       |                                                  |                         |                        |
| prefrail            |                                          |                        |                       |                       | 1.01<br>[0.72 - 1.41]                            | 1.25<br>[0.84 - 1.87]   | 0.59<br>[0.32 - 1.07]  |
| frail               |                                          |                        |                       |                       | 0.48<br>[0.19 - 1.18]                            | 3.64*<br>[1.25 - 10.56] | 0.45<br>[0.08 - 2.40]  |
| 65-70               |                                          |                        |                       |                       |                                                  |                         |                        |
| prefrail            |                                          |                        |                       |                       | 0.80<br>[0.56 - 1.14]                            | 1.41<br>[0.92 - 2.16]   | 0.89<br>[0.52 - 1.55]  |
| frail               |                                          |                        |                       |                       | 0.81<br>[0.29 - 2.27]                            | 0.91<br>[0.23 - 3.57]   | 1.37<br>[0.41 - 4.62]  |
| ≥70                 |                                          |                        |                       |                       |                                                  |                         |                        |
| prefrail            |                                          |                        |                       |                       | 0.92<br>[0.66 - 1.30]                            | 1.52*<br>[1.01 - 2.28]  | 0.51*<br>[0.29 - 0.90] |
| frail               |                                          |                        |                       |                       | 0.88<br>[0.46 - 1.67]                            | 1.19<br>[0.51 - 2.75]   | 0.80<br>[0.33 - 1.95]  |

|             |               |                |                |  |
|-------------|---------------|----------------|----------------|--|
| baseline PF |               |                |                |  |
| 60-64       |               |                |                |  |
| prefrail    | 1.01          | 1.25           | 0.59           |  |
|             | [0.72 - 1.41] | [0.84 - 1.87]  | [0.32 - 1.07]  |  |
| frail       | 0.48          | 3.64*          | 0.45           |  |
|             | [0.19 - 1.18] | [1.25 - 10.56] | [0.08 - 2.40]  |  |
| 65-80       |               |                |                |  |
| prefrail    | 0.83          | 1.52**         | 0.72           |  |
|             | [0.65 - 1.07] | [1.12 - 2.06]  | [0.48 - 1.08]  |  |
| frail       | 0.85          | 1.08           | 1.02           |  |
|             | [0.49 - 1.47] | [0.51 - 2.26]  | [0.49 - 2.14]  |  |
| ≥80         |               |                |                |  |
| prefrail    | 1.87          | 0.72           | 0.30           |  |
|             | [0.62 - 5.64] | [0.21 - 2.51]  | [0.05 - 2.02]  |  |
| frail       | 1.53          | 0.64           | 1.18           |  |
|             | [0.27 - 8.49] | [0.05 - 8.76]  | [0.11 - 13.04] |  |

Note: \*\*\* P<0.001, \*\* P<0.01, \* P<0.05. The model had been adjusted for all covariates. Model 1 had been adjusted for the components numbers in the PFP scale at baseline and Model 2 had been adjusted for the baseline levels of loneliness.

**Table S5.** Standardized estimates of the cross-lagged relationship between change in loneliness and change in physical frailty

|                                                               | 60-64               | 65-70               | $\geq 70$           | 60-64               | 65-80               | $\geq 80$           |
|---------------------------------------------------------------|---------------------|---------------------|---------------------|---------------------|---------------------|---------------------|
| Correlation path                                              |                     |                     |                     |                     |                     |                     |
| T <sub>1</sub> loneliness $\leftrightarrow$ T <sub>1</sub> PF | 0.27***<br>(0.022)  | 0.26***<br>(0.027)  | 0.27***<br>(0.026)  | 0.27***<br>(0.022)  | 0.27***<br>(0.019)  | 0.25**<br>(0.079)   |
| $\Delta$ loneliness $\leftrightarrow$ $\Delta$ PF             | 0.21***<br>(0.024)  | 0.20***<br>(0.031)  | 0.14***<br>(0.029)  | 0.21***<br>(0.024)  | 0.17***<br>(0.022)  | 0.11<br>(0.086)     |
| Autoregressive path                                           |                     |                     |                     |                     |                     |                     |
| T <sub>1</sub> loneliness $\rightarrow$ $\Delta$ loneliness   | -0.59***<br>(0.020) | -0.60***<br>(0.023) | -0.63***<br>(0.021) | -0.59***<br>(0.020) | -0.62***<br>(0.016) | -0.62***<br>(0.058) |
| T <sub>1</sub> PF $\rightarrow$ $\Delta$ PF                   | -0.66***<br>(0.017) | -0.63***<br>(0.021) | -0.61***<br>(0.021) | -0.66***<br>(0.017) | -0.62***<br>(0.015) | -0.59***<br>(0.057) |
| Cross-lagged path                                             |                     |                     |                     |                     |                     |                     |
| T <sub>1</sub> loneliness $\rightarrow$ $\Delta$ PF           | 0.06**<br>(0.021)   | 0.04<br>(0.026)     | 0.08**<br>(0.025)   | 0.06**<br>(0.021)   | 0.06**<br>(0.019)   | 0.05<br>(0.069)     |
| T <sub>1</sub> PF $\rightarrow$ $\Delta$ loneliness           | 0.04*<br>(0.022)    | 0.08**<br>(0.027)   | 0.04+<br>(0.023)    | 0.04*<br>(0.022)    | 0.06**<br>(0.019)   | 0.02<br>(0.063)     |

Note: \*\*\* P<0.001, \*\* P<0.01, \* P<0.05, + P<0.1.
